# Supplementary material for: Mitigation of Gas Porosity in Additive Manufacturing Using Experimental Data Analysis and Mechanistic Modeling
Source: MDPI journal article supplement (doi:10.3390/ma17071569), 2024-03-29
Supplement: s1 [file s1]

# Mitigation of Gas Porosity in Additive Manufacturing Using Experimental Data Analysis and Mechanistic Modeling

Satyaki Sinha and Tuhin Mukherjee \*

Department of Mechanical Engineering, Iowa State University, Ames, IA 50011, USA; satty51@iastate.edu

\*Correspondence: tuhinm@iastate.edu

## **Supplementary File includes:**

Table S1, Thermophysical properties of the four alloys.

An example of calculation procedures: Time to Rise ( $T_R$ ), Time to Solidify ( $T_S$ ), and Gas Porosity Index ( $\tau$ ).

Table S2, Unprocessed process variables, gas property for 93 independent experimental data with defects and defect-free (gas pores and no gas pores) for four alloys.

Comparison with a multi-physics model: The temperature field and molten pool geometry calculated using the mechanistic model used in this work are compared with those obtained from a multi-physics numerical model.

Supplementary References, for more information about the gas porosity defects in additive manufacturing, peer-reviewed literature from which experimental data are taken, and mechanistic model calculations.

**Table S1:** Thermophysical properties [1-3] of the alloys used. Viscosity and surface tension are given at the liquidus temperature of alloys.

| Properties                   | SS 316             | Ti-6Al-4V          | Inconel 718        | AlSi10Mg             |
|------------------------------|--------------------|--------------------|--------------------|----------------------|
| Solidus Temperature (K)      | 1693               | 1878               | 1533               | 831                  |
| Liquidus Temperature (K)     | 1733               | 1928               | 1609               | 867                  |
| Boiling Point (K)            | 3100               | 3133               | 3013               | 1380                 |
| Thermal Conductivity (W/m-K) | 29.76              | 28.09              | 28.56              | 113.00               |
| Specific Heat (J/Kg-K)       | 2894.2             | 524.6              | 409.6              | 565.3                |
| Density (Kg/m <sup>3</sup> ) | 7800               | 4000               | 8100               | 2670                 |
| Viscosity (Kg/m-s)           | $7 \times 10^{-3}$ | $4 \times 10^{-3}$ | $5 \times 10^{-3}$ | $1.3 \times 10^{-3}$ |
| Surface Tension (N/m)        | 1.5                | 1.52               | 1.82               | 0.82                 |
| Powder Packing Efficiency    | 0.6                | 0.65               | 0.7                | 0.58                 |

### An example of calculation procedures:

Here we provide an example of calculation procedures of Time to Rise ( $T_R$ ), Time to Solidify ( $T_S$ ), and Gas Porosity Index ( $\tau$ ). These calculations are for the 93 experimental cases [4-20]. Since the calculation procedures are the same for all four alloys, we have taken into consideration the calculation for the stainless steel 316 as an example. For the data collected in this work, there are 60 gas pore defects and 33 no gas pore defects among the 93 data points from peer-reviewed papers.

| <u>Gas Pore Defects</u> | <u>No Gas Pore Defects</u> | <u>Total</u> |
|-------------------------|----------------------------|--------------|
| 60                      | 33                         | 93           |

Because the Time to Rise ( $T_R$ ) and Time to Solidify ( $T_S$ ) are calculated from the pool dimensions, the initial step is to calculate the molten pool dimensions for a particular power (P) and scanning speed (V). The calculation for the molten pool dimensions is done by using a mechanistic model.

We are using stainless steel 316 as an example calculation. We are taking the data reported in Figure 7 (a) of the main article for the example calculation. The dataset for it is given below:

Power (P) = 300 Watt  
Scanning Speed (V) = 1250 m/s  
Length (L) = 1349  $\mu\text{m}$  = 0.001349 m  
Width (W) = 150  $\mu\text{m}$  = 0.00015 m  
Depth (D) = (W/2) = 75  $\mu\text{m}$  = 0.000075 m

Now time to solidify ( $T_S$ ) can be calculated using Eq. 7 of the main article as,

$$T_S = \frac{0.001349}{1250} \text{ sec} = \mathbf{0.0010792 \text{ sec}}$$

Now we calculate the radius of the gas bubble (r) by balancing the pressure inside the molten pool using Eq. 13 of the main article.

We know, for  $0.0224 \text{ m}^3 = 1 \text{ mole}$

$$\text{Therefore, } \frac{4}{3}\pi r^3 \text{ m}^3 = \left(\frac{4}{3}\pi r^3 * \frac{1}{0.0224}\right) \text{ mole} = 0.029867\pi r^3 \text{ mole}$$

For stainless steel 316,

Surface Tension,  $\sigma = 1.5 \text{ N/m}$

Solidus temperature,  $T = 1693 \text{ K}$

Atmospheric Pressure,  $P_a = 1.013 * 10^5 \text{ Pascal} = 101325 \text{ N/m}^2$

By substituting these values in Eq. 13 of the main article,

$$\frac{4}{3}\pi r^3 \left[101325 + \frac{2*1.5}{r}\right] = 0.029867\pi r^3 * R * T$$

$$\left[101325 + \frac{2*1.5}{r}\right] = 0.1862448 * 1693$$

Solving it we get  $r = \mathbf{0.0000297 \text{ m}}$

Next, we use the value of r in the Stokes Velocity equation (Eq. 14 of the main article) to calculate the velocity of the gas bubble. Difference in density between the molten SS 316 and the gas,

$$\Delta\rho = (7800 - 0.974) \text{ Kg/m}^3 = 7799.026 \text{ Kg/m}^3 \quad \text{where } \rho_g = 0.974 \text{ Kg/m}^3$$

Viscosity of the alloy,  $\mu = 0.007 \text{ Kg/m-s}$ , acceleration due to gravity,  $g = 10 \text{ m/s}^2$

Now substituting the values in Eq. 14 of the main article,

$$u_s = \frac{2*(0.0000297)^2*7799.026*10}{9*0.007} = 0.0022283 \text{ m/s}$$

To find the escape velocity, we also need the convective velocity ( $u_c$ ) using Eq. 15 of the main article. To do so, we also need the following alloy properties:

Co-efficient of volume expansion,  $\beta = 10^{-5} \text{ K}^{-1}$

Depth of the molten pool,  $D = 0.000075 \text{ m}$

Acceleration due to gravity,  $g = 10 \text{ m/s}^2$

Temperature Gradient,  $\Delta T = \left(\frac{T_{sol}+T_{boil}}{2} - T_{sol}\right) = \left(\frac{1693+3100}{2} - 1693\right) = 703.5 \text{ K}$

From Eq. 15 of the main article, we get:

$$u_c = \sqrt{(10 * 10^{-5} * 703.5 * 0.000075)} = 0.002297009 \text{ m/s}$$

Now, substituting the Stokes velocity and convective velocity in the equation of escape velocity, (Eq. 16 of the main article) we get,

$$u_e = u_s + u_c = (0.0022283 + 0.002297009) \text{ m/s} = 0.004525309 \text{ m/s}$$

Therefore, the time to rise ( $T_R$ ) is calculated as:

$$T_R = \frac{0.000075}{0.004525309} \text{ sec} = \mathbf{0.016573454 \text{ sec}}$$

Therefore, the gas porosity index ( $\tau$ ) =  $\frac{\text{Time to Rise } (T_R)}{\text{Time to Solidify } (T_S)} = \frac{0.016573454}{0.0010792}$

**Gas Porosity Index,  $\tau = 15.35$**

**Table S2:** Process parameters and computed variables for 93 experimental cases [4-19].

| No. | Alloy               | Laser power (W) | Scan Speed (mm/s) | Length (micron) | Width (micron) | Depth (micron) | Time to Rise (s) | Time to Solidify (s) | Gas Porosity Index | Ref. |
|-----|---------------------|-----------------|-------------------|-----------------|----------------|----------------|------------------|----------------------|--------------------|------|
| 1   | Stainless Steel 316 | 175             | 750               | 796             | 146            | 73             | 1.624E-02        | 1.060E-03            | 15.32              | 4    |
| 2   |                     | 100             | 500               | 466             | 134            | 67             | 1.523E-02        | 9.320E-04            | 16.34              |      |
| 3   |                     | 100             | 750               | 460             | 110            | 55             | 1.310E-02        | 6.100E-04            | 21.48              |      |
| 4   |                     | 100             | 1000              | 458             | 96             | 48             | 1.180E-02        | 4.580E-04            | 25.76              |      |
| 5   |                     | 175             | 1000              | 793             | 128            | 64             | 1.470E-02        | 7.930E-04            | 18.54              |      |
| 6   |                     | 70              | 500               | 331             | 112            | 56             | 1.330E-02        | 6.640E-04            | 20.03              |      |
| 7   |                     | 50              | 500               | 240             | 94             | 47             | 1.161E-02        | 4.800E-04            | 24.19              |      |
| 8   |                     | 30              | 500               | 149             | 70             | 35             | 9.220E-03        | 2.980E-04            | 30.94              |      |
| 9   |                     | 200             | 1400              | 1008            | 114            | 57             | 1.350E-02        | 7.200E-04            | 18.75              | 5    |
| 10  |                     | 200             | 1800              | 898             | 102            | 51             | 1.237E-02        | 5.000E-04            | 24.74              |      |
| 11  |                     | 200             | 2200              | 897             | 92             | 46             | 1.140E-02        | 4.100E-04            | 27.80              |      |
| 12  |                     | 200             | 2600              | 896             | 82             | 41             | 1.044E-02        | 3.450E-04            | 30.26              |      |
| 13  |                     | 275             | 1800              | 1232            | 120            | 60             | 1.401E-02        | 6.800E-04            | 20.60              |      |
| 14  |                     | 275             | 2200              | 1233            | 108            | 54             | 1.293E-02        | 5.600E-04            | 23.09              |      |
| 15  |                     | 275             | 2600              | 1230            | 100            | 50             | 1.220E-02        | 4.700E-04            | 25.96              |      |
| 16  |                     | 275             | 3000              | 1231            | 92             | 46             | 1.142E-02        | 4.100E-04            | 27.85              |      |
| 17  |                     | 350             | 2200              | 1563            | 122            | 61             | 1.419E-02        | 7.100E-04            | 19.99              |      |
| 18  |                     | 350             | 2600              | 1565            | 112            | 56             | 1.330E-02        | 6.020E-04            | 22.09              |      |
| 19  |                     | 350             | 3000              | 1565            | 104            | 52             | 1.256E-02        | 5.200E-04            | 24.15              |      |
| 20  |                     | 350             | 3400              | 1564            | 98             | 49             | 1.200E-02        | 4.600E-04            | 26.08              |      |
| 21  |                     | 125             | 400               | 582             | 168            | 84             | 1.800E-02        | 1.460E-03            | 9.36               |      |
| 22  |                     | 125             | 600               | 575             | 138            | 69             | 1.560E-02        | 9.600E-04            | 10.08              |      |
| 23  |                     | 125             | 800               | 571             | 120            | 60             | 1.401E-02        | 7.140E-04            | 10.55              |      |
| 24  |                     | 200             | 400               | 920             | 214            | 107            | 2.150E-02        | 2.300E-03            | 12.10              |      |
| 25  |                     | 200             | 600               | 912             | 174            | 87             | 1.850E-02        | 1.520E-03            | 12.17              |      |
| 26  |                     | 200             | 800               | 907             | 152            | 76             | 1.674E-02        | 1.134E-03            | 12.17              |      |
| 27  |                     | 200             | 1000              | 903             | 136            | 68             | 1.540E-02        | 9.030E-04            | 12.39              |      |
| 28  |                     | 200             | 1200              | 902             | 124            | 62             | 1.440E-02        | 7.500E-04            | 13.54              |      |
| 29  |                     | 275             | 600               | 1246            | 206            | 103            | 2.090E-02        | 2.080E-03            | 14.05              |      |
| 30  |                     | 275             | 800               | 1244            | 178            | 89             | 1.881E-02        | 1.560E-03            | 14.76              |      |
| 31  |                     | 275             | 1000              | 1238            | 160            | 80             | 1.740E-02        | 1.240E-03            | 15.09              |      |
| 32  |                     | 275             | 1200              | 1237            | 146            | 73             | 1.620E-02        | 1.030E-03            | 15.76              |      |
| 33  |                     | 275             | 1400              | 1237            | 136            | 68             | 1.540E-02        | 8.840E-04            | 16.25              |      |
| 34  |                     | 350             | 800               | 1576            | 204            | 102            | 2.080E-02        | 1.970E-03            | 17.05              |      |
| 35  |                     | 350             | 1000              | 1572            | 182            | 91             | 1.910E-02        | 1.572E-03            | 17.43              |      |
| 36  |                     | 350             | 1200              | 1570            | 164            | 82             | 1.771E-02        | 1.310E-03            | 17.71              |      |
| 37  |                     | 350             | 1400              | 1568            | 154            | 77             | 1.690E-02        | 1.120E-03            | 19.11              |      |
| 38  |                     | 350             | 1800              | 1565            | 136            | 68             | 1.540E-02        | 8.700E-04            | 19.63              |      |
| 39  | AlSi10Mg            | 360             | 1000              | 873             | 524            | 262            | 6.758E-02        | 8.700E-04            | 77.68              | 6    |
| 40  |                     | 170             | 800               | 462             | 356            | 178            | 5.227E-02        | 5.760E-04            | 90.75              | 7    |
| 41  |                     | 180             | 900               | 479             | 356            | 178            | 5.227E-02        | 5.320E-04            | 98.25              |      |
| 42  |                     | 190             | 1000              | 495             | 354            | 177            | 5.207E-02        | 4.950E-04            | 105.19             | 8    |
| 43  |                     | 200             | 1200              | 507             | 340            | 170            | 5.066E-02        | 4.225E-04            | 119.91             |      |
| 44  |                     | 180             | 1400              | 454             | 302            | 151            | 4.670E-02        | 3.240E-04            | 144.14             | 7    |

|    |                |     |      |      |     |      |           |           |        |       |
|----|----------------|-----|------|------|-----|------|-----------|-----------|--------|-------|
| 45 |                | 190 | 1500 | 472  | 302 | 151  | 4.673E-02 | 3.150E-04 | 148.35 | 9     |
| 46 |                | 200 | 1600 | 492  | 304 | 152  | 4.694E-02 | 3.075E-04 | 152.65 |       |
| 47 |                | 381 | 1567 | 887  | 444 | 222  | 6.060E-02 | 5.700E-04 | 70.29  |       |
| 48 |                | 295 | 1167 | 720  | 434 | 217  | 5.968E-02 | 6.170E-04 | 70.91  |       |
| 49 |                | 372 | 915  | 908  | 550 | 275  | 6.975E-02 | 9.920E-04 | 86.67  |       |
| 50 |                | 321 | 1077 | 784  | 472 | 236  | 6.310E-02 | 7.300E-04 | 96.74  |       |
| 51 |                | 299 | 1267 | 723  | 424 | 212  | 5.877E-02 | 5.700E-04 | 102.98 |       |
| 52 |                | 325 | 851  | 811  | 524 | 262  | 6.758E-02 | 9.530E-04 | 107.04 |       |
| 53 | Inconel<br>718 | 95  | 200  | 650  | 222 | 111  | 1.470E-02 | 3.250E-03 | 4.52   | 10    |
| 54 |                | 95  | 800  | 623  | 112 | 56   | 8.350E-03 | 7.790E-04 | 10.72  |       |
| 55 |                | 75  | 800  | 495  | 100 | 50   | 7.580E-03 | 6.188E-04 | 12.25  |       |
| 56 |                | 75  | 1200 | 492  | 81  | 40.5 | 6.390E-03 | 4.100E-04 | 15.59  |       |
| 57 |                | 75  | 1600 | 490  | 72  | 36   | 5.710E-03 | 3.060E-04 | 18.66  |       |
| 58 |                | 75  | 2000 | 489  | 64  | 32   | 5.150E-03 | 2.445E-04 | 21.06  |       |
| 59 |                | 120 | 800  | 784  | 126 | 63   | 9.220E-03 | 9.800E-04 | 9.41   | 11    |
| 60 |                | 120 | 1200 | 782  | 104 | 52   | 7.840E-03 | 6.520E-04 | 12.02  |       |
| 61 |                | 285 | 1000 | 1840 | 176 | 88   | 1.218E-02 | 1.840E-03 | 6.62   |       |
| 62 |                | 230 | 760  | 1492 | 180 | 90   | 1.241E-02 | 1.963E-03 | 6.32   |       |
| 63 | Ti6Al4V        | 200 | 700  | 1302 | 176 | 88   | 1.218E-02 | 1.860E-03 | 6.55   | 10    |
| 64 |                | 95  | 750  | 625  | 116 | 58   | 8.601E-03 | 8.333E-04 | 10.32  |       |
| 65 |                | 95  | 650  | 627  | 124 | 62   | 9.099E-03 | 9.646E-04 | 9.43   | 12    |
| 66 |                | 297 | 500  | 1865 | 260 | 130  | 2.752E-02 | 3.730E-03 | 7.38   |       |
| 67 |                | 280 | 1200 | 1744 | 162 | 81   | 1.965E-02 | 1.453E-03 | 13.52  | 14,15 |
| 68 |                | 280 | 400  | 1762 | 278 | 139  | 2.883E-02 | 4.405E-03 | 6.54   |       |
| 69 |                | 280 | 800  | 1747 | 198 | 99   | 2.270E-02 | 2.184E-03 | 10.40  |       |
| 70 |                | 280 | 1000 | 1749 | 176 | 88   | 2.086E-02 | 1.749E-03 | 11.93  |       |
| 71 |                | 280 | 1500 | 1740 | 146 | 73   | 1.821E-02 | 1.160E-03 | 15.70  |       |
| 72 |                | 370 | 1200 | 2298 | 184 | 92   | 2.154E-02 | 1.915E-03 | 11.25  |       |
| 73 |                | 325 | 1200 | 2026 | 176 | 88   | 2.086E-02 | 1.688E-03 | 12.36  |       |
| 74 |                | 100 | 1200 | 629  | 96  | 48   | 1.332E-02 | 5.242E-04 | 25.41  |       |
| 75 |                | 165 | 1200 | 1031 | 124 | 62   | 1.614E-02 | 8.592E-04 | 18.79  |       |
| 76 |                | 370 | 1000 | 2295 | 204 | 102  | 2.319E-02 | 2.295E-03 | 10.10  |       |
| 77 |                | 120 | 220  | 781  | 240 | 120  | 2.602E-02 | 3.550E-03 | 7.33   | 16    |
| 78 |                | 140 | 231  | 907  | 258 | 129  | 2.737E-02 | 3.926E-03 | 6.97   |       |
| 79 |                | 140 | 509  | 888  | 176 | 88   | 2.086E-02 | 1.745E-03 | 11.96  |       |
| 80 |                | 42  | 200  | 311  | 194 | 97   | 2.237E-02 | 1.555E-03 | 14.39  | 17    |
| 81 |                | 42  | 100  | 358  | 254 | 127  | 2.707E-02 | 3.580E-03 | 7.56   |       |
| 82 |                | 50  | 200  | 344  | 158 | 79   | 1.929E-02 | 1.720E-03 | 11.22  | 18    |
| 83 |                | 75  | 400  | 486  | 142 | 71   | 1.784E-02 | 1.215E-03 | 14.69  |       |
| 84 |                | 100 | 600  | 638  | 136 | 68   | 1.728E-02 | 1.063E-03 | 16.26  |       |
| 85 |                | 125 | 800  | 786  | 132 | 66   | 1.691E-02 | 9.825E-04 | 17.21  | 19    |
| 86 |                | 150 | 1000 | 942  | 128 | 64   | 1.653E-02 | 9.420E-04 | 17.54  |       |
| 87 |                | 175 | 1200 | 1093 | 128 | 64   | 1.653E-02 | 9.108E-04 | 18.15  |       |
| 88 |                | 195 | 1200 | 1218 | 136 | 68   | 1.728E-02 | 1.015E-03 | 17.03  |       |
| 89 |                | 195 | 225  | 1251 | 310 | 155  | 3.108E-02 | 5.560E-03 | 5.59   |       |
| 90 |                | 215 | 50   | 1467 | 664 | 332  | 5.160E-02 | 2.934E-02 | 1.76   | --    |
| 91 |                | 215 | 100  | 1413 | 482 | 241  | 4.190E-02 | 1.413E-02 | 1.76   |       |
| 92 |                | 215 | 150  | 1393 | 396 | 198  | 3.670E-02 | 9.290E-03 | 2.93   |       |
| 93 |                | 42  | 50   | 292  | 146 | 73   | 1.821E-02 | 5.840E-03 | 3.95   | 17    |

### Comparison with a multi-physics model:

Figure S1 shows the temperature fields and molten pool geometry on the longitudinal section during LPBF of stainless steel 316 using 300 W laser power and 1250 mm/s scanning speed. Figure S1 (a) shows the result computed using the mechanistic model employed in this work. Essentially, the result corresponds to the top view shown in Figure 3 (a) of the main article. Figure S1 (b) shows the result calculated using a multi-physics, 3D, transient heat transfer and fluid flow model [20]. In both figures, the isotherms are elongated near the trailing edge of the molten pool due to rapid scanning. In Figure S1 (b), the black vectors represent the convective flow of the molten metal. The velocity magnitudes can be estimated by comparing their lengths with the reference vector provided. The convective flow mixes the hot and cold liquids and significantly change the temperature inside the molten pool. However, the molten pool geometries computed using the two models are similar. Since, the susceptibility to gas porosity depends on the pool geometry, the mechanistic model is useful for this purpose for a time-efficient prediction.

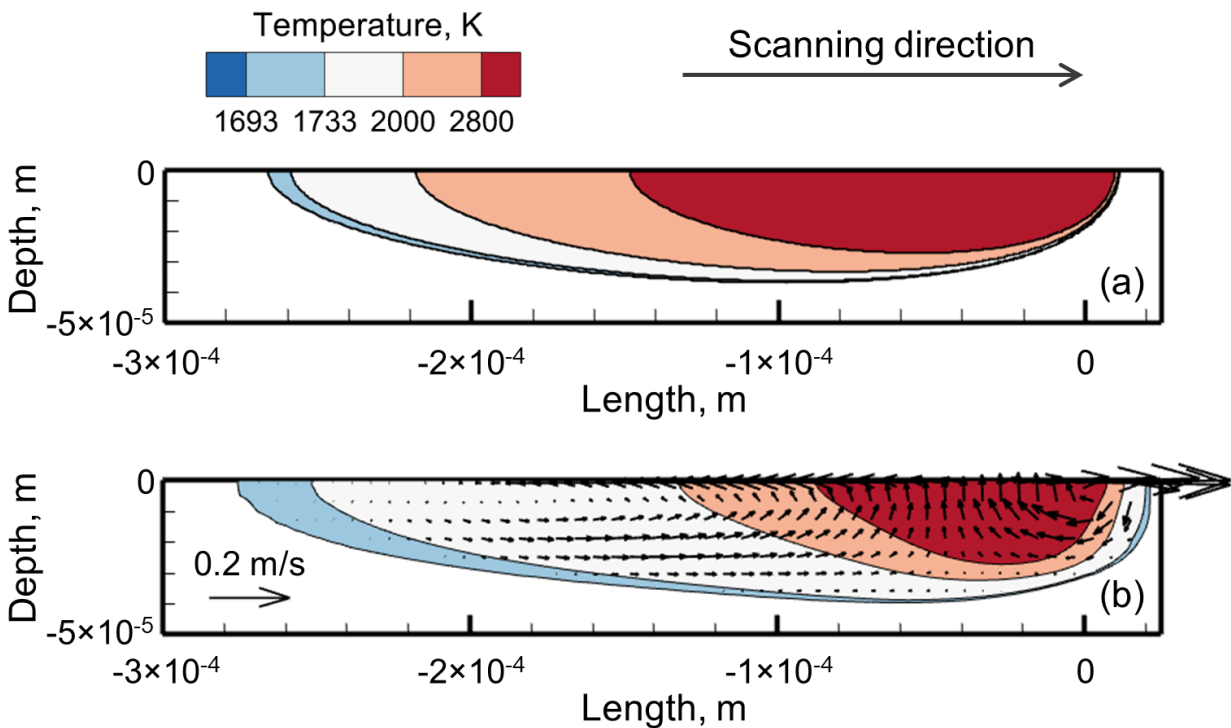

**Figure S1:** Temperature fields and molten pool geometry on the longitudinal section during LPBF of stainless steel 316 using 300 W laser power and 1250 mm/s scanning speed calculated using (a) the mechanistic model used in this work and (b) a multi-physics, 3D, transient heat transfer and fluid flow model [20].

## Supplementary References

- 1) Mills, K. C. (2002). Recommended values of thermophysical properties for selected commercial alloys. Woodhead Publishing.
- 2) DebRoy, T., Wei, H. L., Zuback, J. S., Mukherjee, T., Elmer, J. W., Milewski, J. O., ... & Zhang, W. (2018). Additive manufacturing of metallic components—process, structure and properties. *Progress in Materials Science*, 92, 112-224.
- 3) Wei, H. L., Mukherjee, T., Zhang, W., Zuback, J. S., Knapp, G. L., De, A., & DebRoy, T. (2021). Mechanistic models for additive manufacturing of metallic components. *Progress in Materials Science*, 116, 100703.
- 4) Reijonen, J., Revuelta, A., Riipinen, T., Ruusuvuori, K., & Puukko, P. (2020). On the effect of shielding gas flow on porosity and melt pool geometry in laser powder bed fusion additive manufacturing. *Additive Manufacturing*, 32, 101030.
- 5) Diaz Vallejo, N., Lucas, C., Ayers, N., Graydon, K., Hyer, H., & Sohn, Y. (2021). Process optimization and microstructure analysis to understand laser powder bed fusion of 316L stainless steel. *Metals*, 11(5), 832.
- 6) Riener, K., Oswald, S., Winkler, M., & Leichtfried, G. J. (2021). Influence of storage conditions and reconditioning of AlSi10Mg powder on the quality of parts produced by laser powder bed fusion (LPBF). *Additive Manufacturing*, 39, 101896.
- 7) Kempen, K., Thijs, L., Van Humbeeck, J., & Kruth, J. P. (2015). Processing AlSi10Mg by selective laser melting: parameter optimisation and material characterisation. *Materials Science and Technology*, 31(8), 917-923.
- 8) Masiagutova, E., Cabanettes, F., Sova, A., Cici, M., Bidron, G., & Bertrand, P. (2021). Side surface topography generation during laser powder bed fusion of AlSi10Mg. *Additive Manufacturing*, 47, 102230.
- 9) Engelhardt, A., Kahl, M., Richter, J., Krooß, P., Kroll, A., & Niendorf, T. (2022). Investigation of processing windows in additive manufacturing of AlSi10Mg for faster production utilizing data-driven modeling. *Additive Manufacturing*, 55, 102858.
- 10) Khademzadeh, S., Gennari, C., Zanollo, A., Franceschi, M., Campagnolo, A., & Brunelli, K. (2022). Development of micro laser powder bed fusion for additive manufacturing of Inconel 718. *Materials*, 15(15), 5231.
- 11) Tran, H. C., Lo, Y. L., Le, T. N., Lau, A. K. T., & Lin, H. Y. (2022). Multi-scale simulation approach for identifying optimal parameters for fabrication of high-density Inconel 718 parts using selective laser melting. *Rapid Prototyping Journal*, 28(1), 109-125.
- 12) Vastola, G., Pei, Q. X., & Zhang, Y. W. (2018). Predictive model for porosity in powder-bed fusion additive manufacturing at high beam energy regime. *Additive Manufacturing*, 22, 817-822.
- 13) Narra, S. P., Rollett, A. D., Ngo, A., Scannapieco, D., Shahabi, M., Reddy, T., ... & Lewandowski, J. J. (2023). Process qualification of laser powder bed fusion based on processing-defect structure-fatigue properties in Ti-6Al-4V. *Journal of Materials Processing Technology*, 311, 117775.
- 14) Gordon, J. V., Narra, S. P., Cunningham, R. W., Liu, H., Chen, H., Suter, R. M., ... & Rollett, A. D. (2020). Defect structure process maps for laser powder bed fusion additive manufacturing. *Additive Manufacturing*, 36, 101552.
- 15) Cunningham, R., Narra, S. P., Montgomery, C., Beuth, J., & Rollett, A. D. (2017). Synchrotron-based X-ray microtomography characterization of the effect of processing

- variables on porosity formation in laser power-bed additive manufacturing of Ti-6Al-4V. *Jom*, 69, 479-484.
- 16) Wu, Z., Asherloo, M., Jiang, R., Delpazir, M. H., Sivakumar, N., Paliwal, M., ... & Mostafaei, A. (2021). Study of printability and porosity formation in laser powder bed fusion built hydride-dehydride (HDH) Ti-6Al-4V. *Additive Manufacturing*, 47, 102323.
  - 17) Jaber, H., & Tünde, K. (2020). Development of Selective Laser Melting of Ti6Al4V Alloy for Tissue Engineering.
  - 18) Sanaei, N., & Fatemi, A. (2020). Analysis of the effect of internal defects on fatigue performance of additive manufactured metals. *Materials Science and Engineering: A*, 785, 139385.
  - 19) Emminghaus, N., Paul, J., Hoff, C., Hermsdorf, J., & Kaierle, S. (2022). Development of an empirical process model for adjusted porosity in laser-based powder bed fusion of Ti-6Al-4V. *The International Journal of Advanced Manufacturing Technology*, 118(3-4), 1239-1254.
  - 20) Mukherjee, T., Wei, H.L., De, A., & DebRoy, T. (2018). Heat and fluid flow in additive manufacturing—Part I: Modeling of powder bed fusion. *Computational Materials Science*, 150, 304-313.
